# Supplementary material for: A novel, glutathione-activated prodrug of pimasertib loaded in liposomes for targeted cancer therapy
Source: Royal Society of Chemistry journal article supplement (doi:10.1039/d4md00517a), 2024-10-03
Supplement: d4md00517a2.pdf [file d4md00517a2.pdf]

*Supplementary materials for:*

## **A novel, glutathione-activated prodrug of Pimasertib loaded in liposomes for targeted cancer therapy**

Arianna Amenta <sup>a†</sup>, Susanna Comi <sup>b†</sup>, Marcelo Kravicz <sup>b</sup>, Silvia Sesana <sup>b</sup>, Antonia Antoniou <sup>c</sup>, Daniele Passarella <sup>a</sup>, Pierfausto Seneci <sup>a</sup>, Sara Pellegrino <sup>c</sup>, Francesca Re <sup>b\*</sup>

<sup>1</sup> School of Medicine and Surgery, university of Milano-Bicocca, Monza, Italy

<sup>2</sup> Department of Chemistry, University of Milan, Milan, Italy

<sup>3</sup> Department of Pharmaceutical Sciences, University of Milan, Milan, Italy

<sup>†</sup> These Authors have contributed equally

\* Correspondence to Francesca Re, Email: francesca.re1@unimib.it

### **Table of contents:**

|                                                                          |   |
|--------------------------------------------------------------------------|---|
| 1. HPLC chromatogram (Figure S1)                                         | 1 |
| 2. H <sup>1</sup> and C <sup>13</sup> NMR Spectra of PROPIMA (Figure S2) | 2 |
| 3. LC-MS of PROPIMA (Figure S3)                                          | 3 |

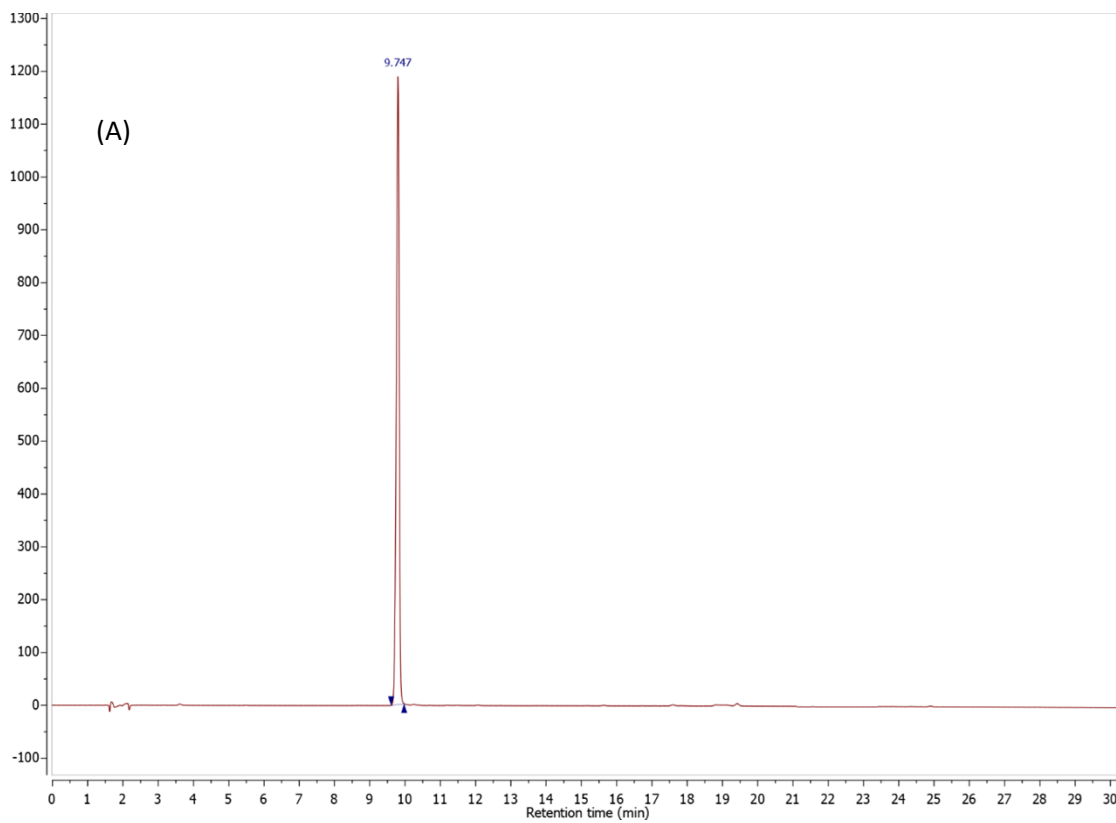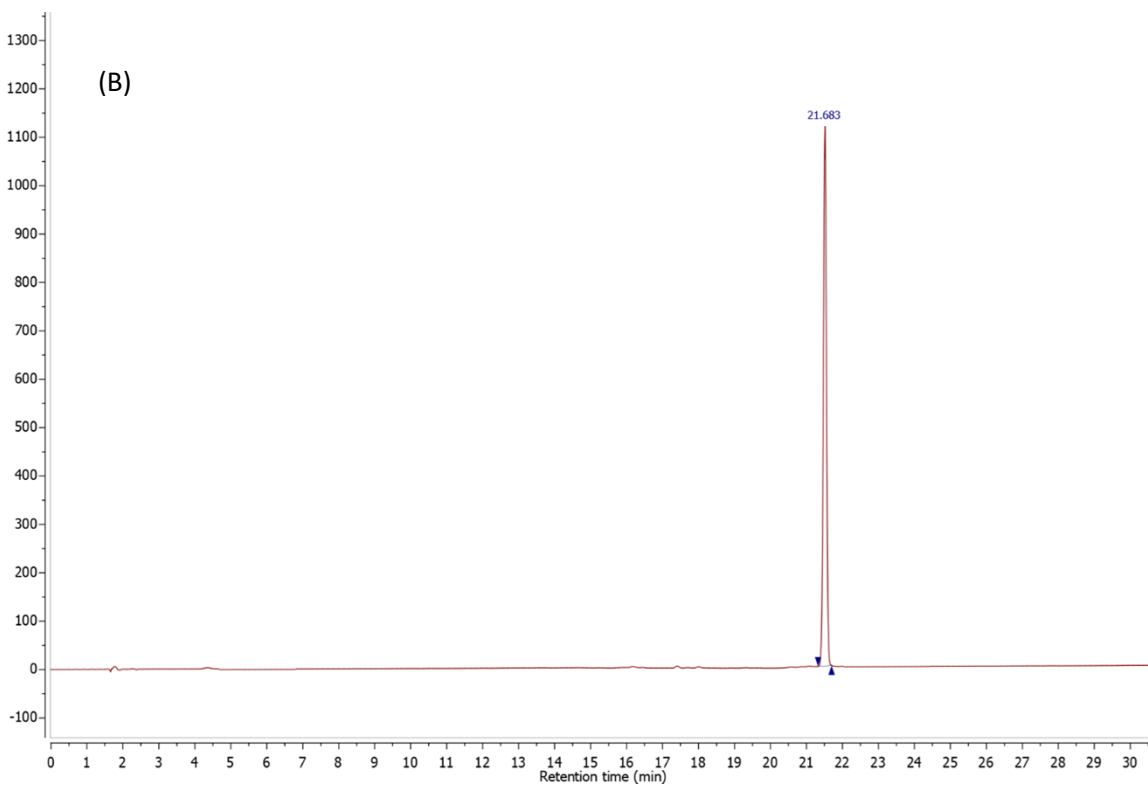

**Figure S1.** HPLC chromatograms for Pimasertib (A) and PROPIMA (B).



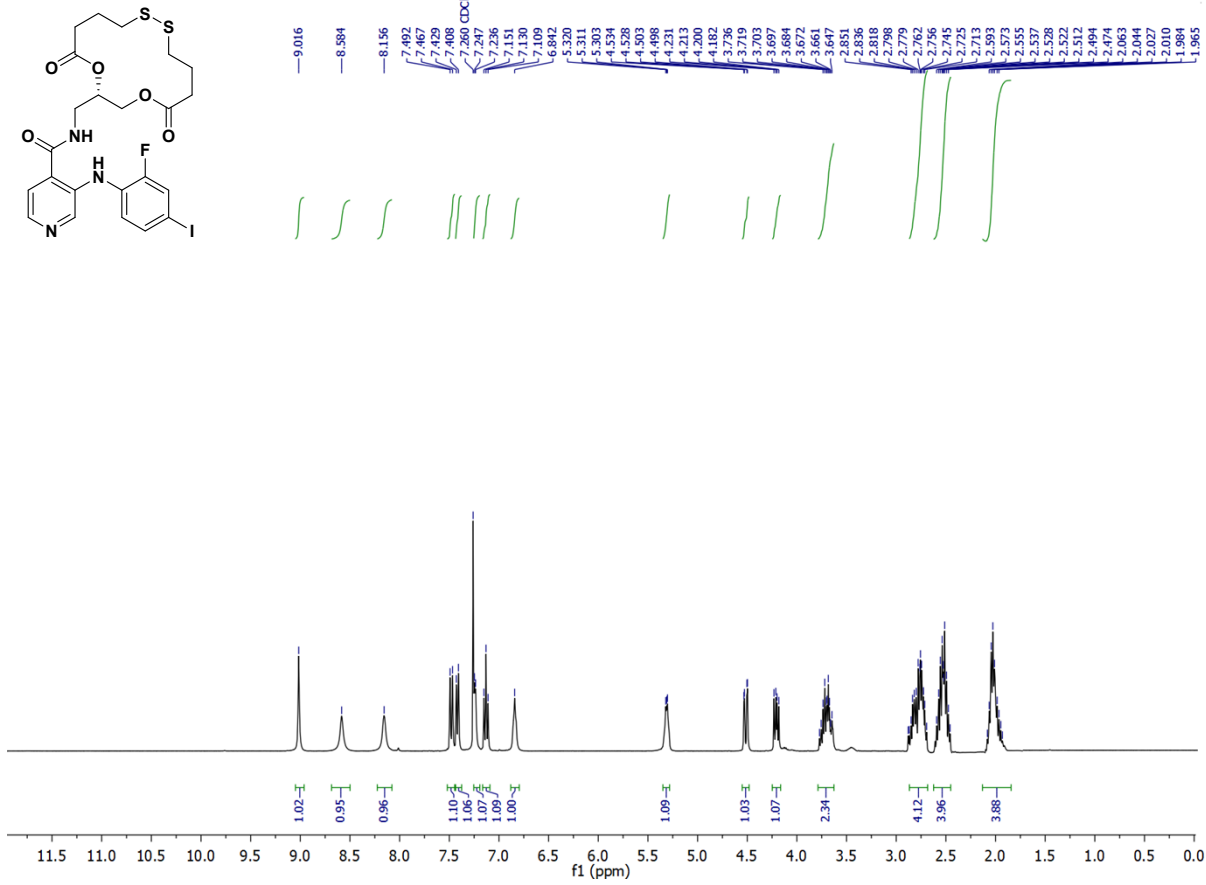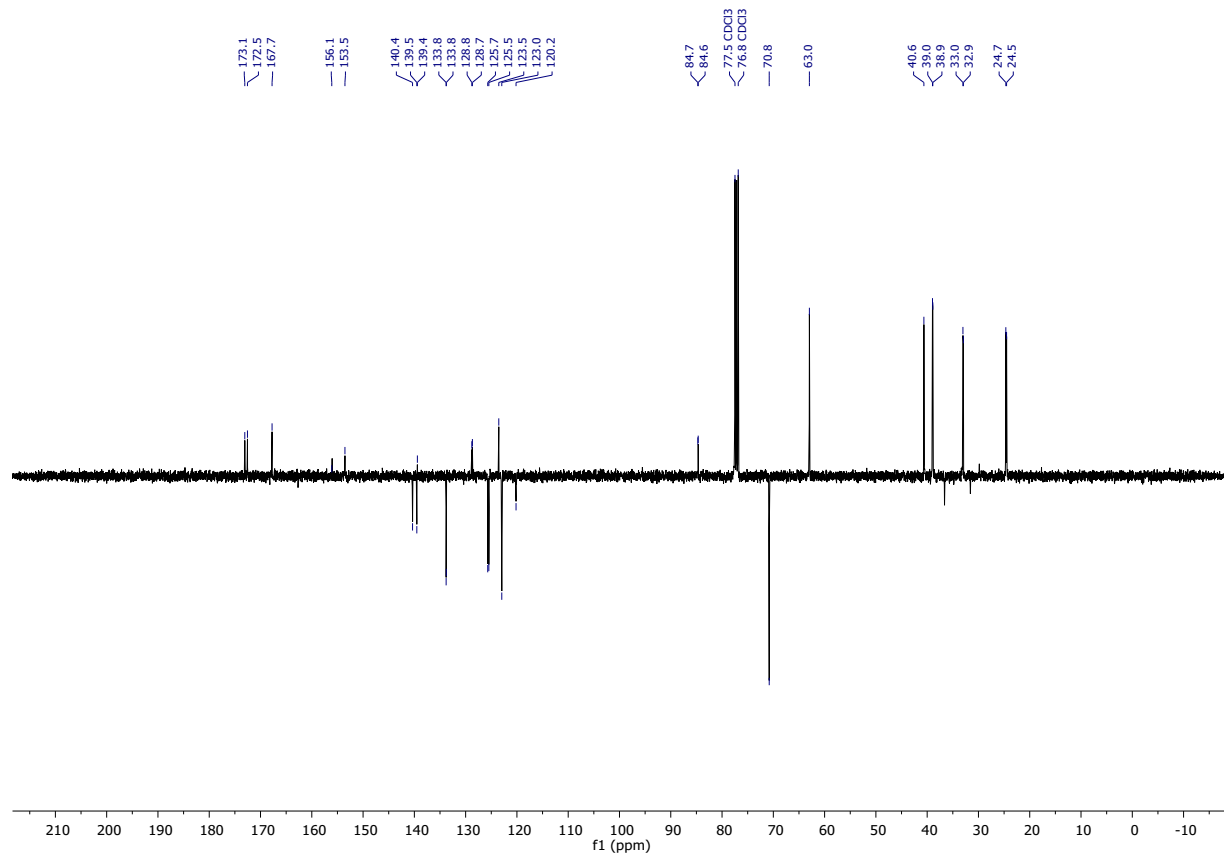

re S2. <sup>1</sup>H and <sup>13</sup>C NMR spectra of PROPIMA.

Fig

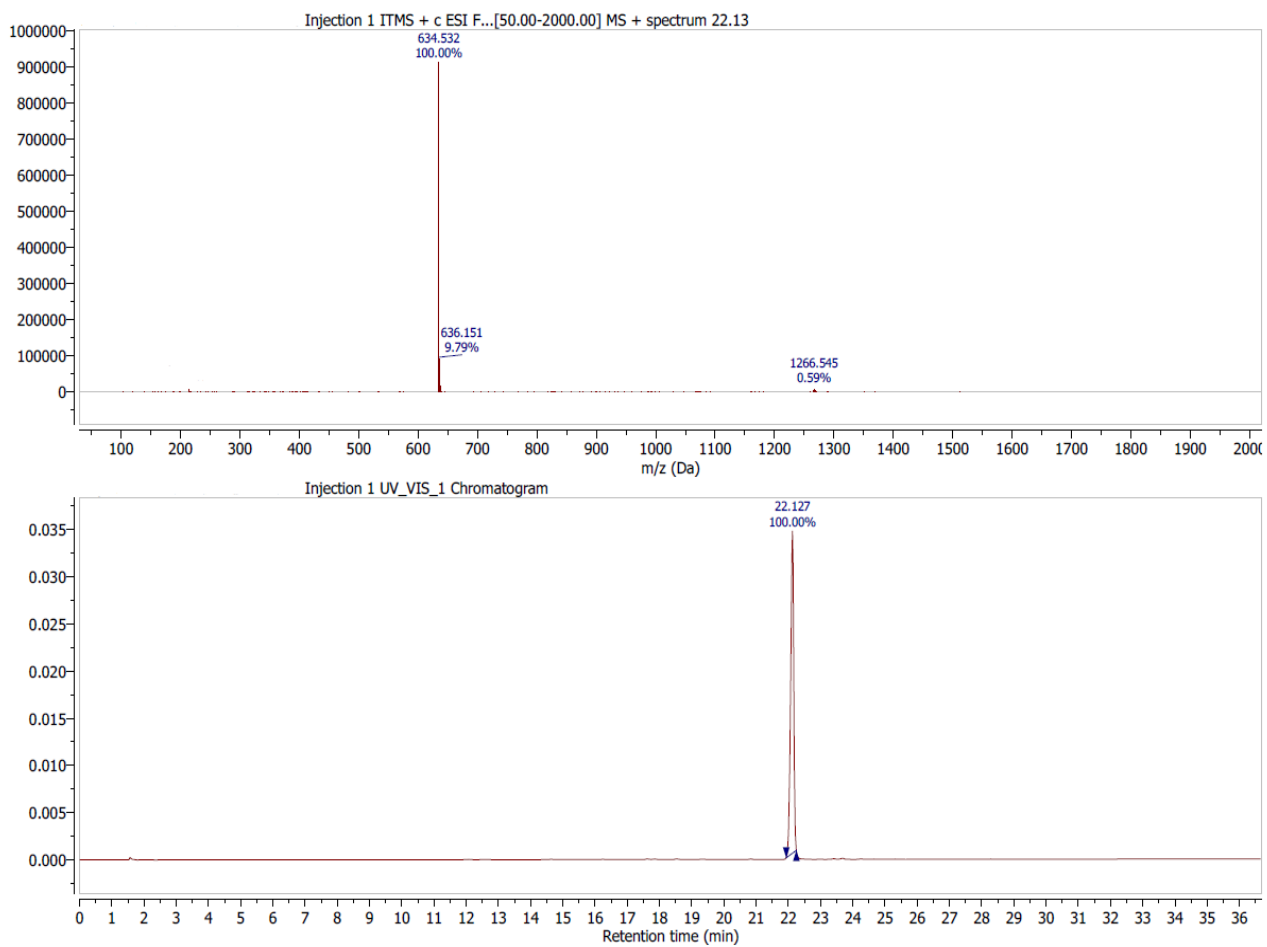

**Figure S3.** LC-MS of PROPIMA.

Predicted  $m/z$   $[M+H]^+$ : 633.03, found 634.532.

## Supplementary Methods

**Determination of Glutathione peroxidase (GpX) activity.** Either A375 or hCMEC/D3 cells were seeded in Petri dishes (300000 cells/cm<sup>2</sup> and 400000 cells/cm<sup>2</sup>, respectively) and cultured in complete medium for 48 hours. Then, whole cell lysates were obtained, and the total protein content was measured as previously described [PMID: 35740641]. To measure GpX activities, we used an enzyme assay kit (Abcam ab219926) [PMID: 31562333], that entails as a first reaction the conversion of reduced glutathione (GSH) to oxidized glutathione (GSSG). Later, GSSG and NADPH chemically interact to produce GSH and NADP<sup>+</sup>, with the help of glutathione reductase. In this GpX activity assay, we used a NADP sensor specific for NADP<sup>+</sup> to produce a fluorescent product at 420/480 nm (Ex/Em). The fluorescence was recorder with the microplate reader TECAN (infinite F200 PRO) in kinetic modality every 3 minutes for 30 minutes. The GpX activity is directly proportional to the signal obtained.
