# Supplementary figures and images for: A novel, glutathione-activated prodrug of pimasertib loaded in liposomes for targeted cancer therapy
Source: Royal Society of Chemistry journal article supplement (doi:10.1039/d4md00517a), 2024-10-03

Figure 5, Panel B (original WB)

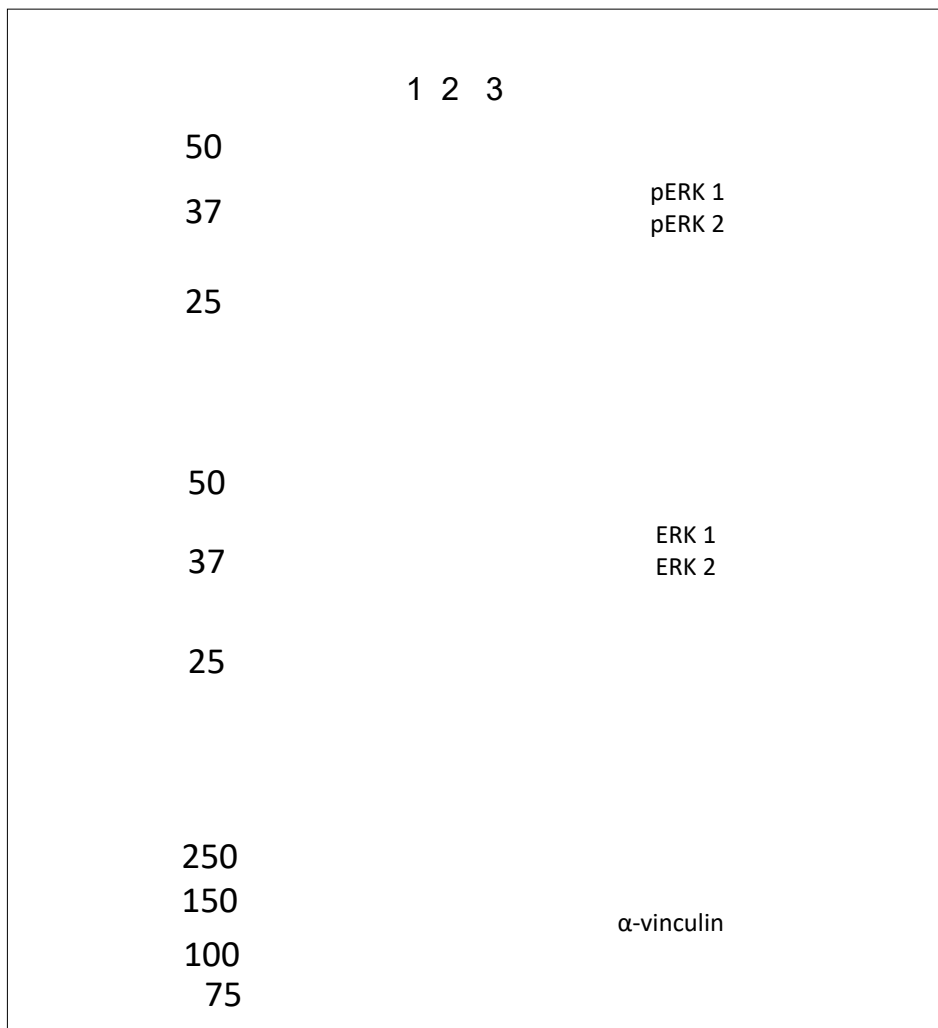

Figure 8, Panel B (original WB)

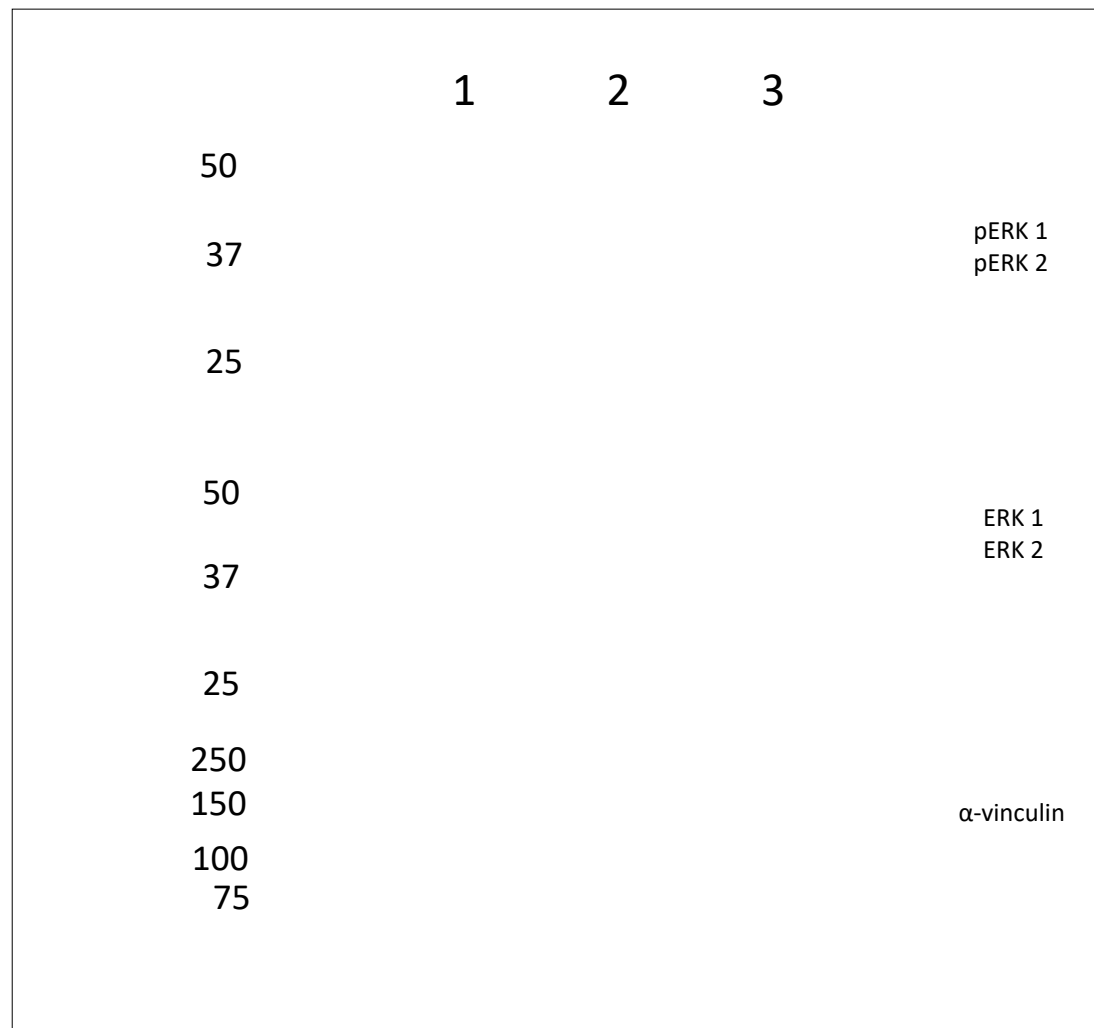

Supplement: d4md00517a1.pdf [file d4md00517a1.pdf]
